# Supplementary material for: β-NiS modified CdS nanowires for photocatalytic H2 evolution with exceptionally high efficiency
Source: Royal Society of Chemistry journal article supplement (doi:10.1039/c7sc03928j), 2017-12-13
Supplement: c7sc03928j1.pdf [file c7sc03928j1.pdf]

## Electronic Supplementary Information

### **$\beta$ -NiS modified CdS nanowires for photocatalytic H<sub>2</sub> evolution with exceptionally high efficiency**

Shundong Guan,<sup>a,b</sup> Xiuli Fu,<sup>\*a</sup> Yu Zhang<sup>a,b</sup> and Zhijian Peng<sup>\*b</sup>

<sup>a</sup> *State Key Laboratory of Information Photonics and Optical Communications, and School of Science, Beijing*

*University of Posts and Telecommunications, Beijing 100876, P.R. China*

<sup>b</sup> *School of Science, China University of Geosciences, Beijing 100083, P.R. China*

<sup>a</sup>*xiulifu@bupt.edu.cn*; <sup>b</sup>*pengzhijian@cugb.edu.cn*

Financial support from the National Natural Science Foundation of China (grant nos. 11674035, 11274052, and 61274015), and Fund of State Key Laboratory of Information Photonics and Optical Communications (Beijing University of Posts and Telecommunications) is gratefully acknowledged.

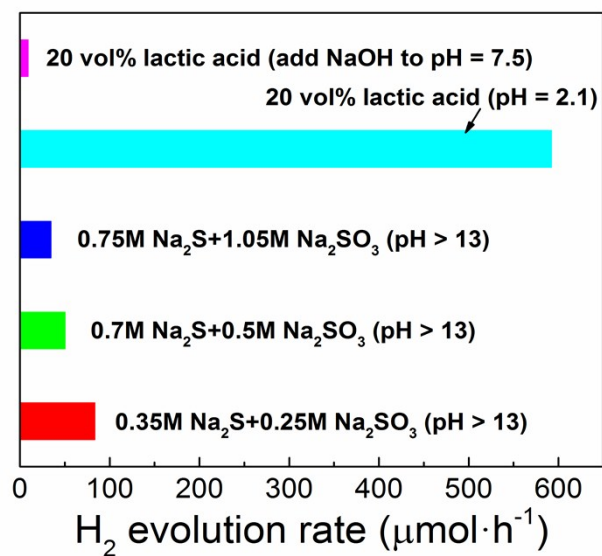

**Figure S1** The H<sub>2</sub> evolution rate under different sacrificial agent solutions over the optimal NiS/CdS NWs prepared at the Ni/Cd feed molar ratio of 0.8. The data were calculated based on the H<sub>2</sub> amount generated in the first 4 h reaction. Reaction conditions: 5 mg of the catalyst; 100 mL of aqueous solution; 7 °C; and visible light irradiation ( $\lambda \geq 420$  nm) provided by a 300 W Xe lamp with an UV cut-off filter. This figure reveals that the acidic conditions provided by 20 vol.% of lactic acid aqueous solution is beneficial for the photocatalytic H<sub>2</sub> evolution over the present NiS/CdS NWs.

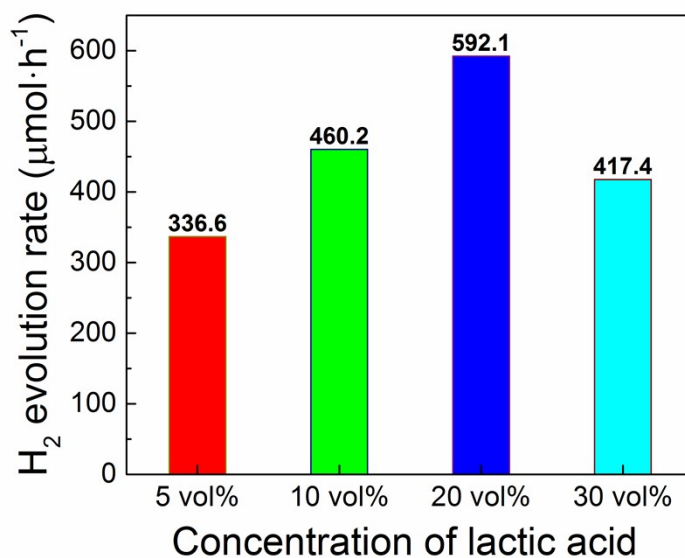

**Figure S2** The rate of photocatalytic H<sub>2</sub> evolution in different concentrations of lactic acid aqueous solution over the β-NiS modified CdS nanowires (NiS/CdS NWs) prepared at a Ni/Cd feed molar ratio of 0.8 in the synthesis reaction. The data were calculated based on the H<sub>2</sub> amount generated in the first 4 h of reaction. Reaction conditions: 5 mg of the photocatalyst; 100 mL of aqueous solution; 7 °C; and visible light irradiation ( $\lambda \geq 420$  nm) provided by a 300 W Xe lamp with an UV cut-off filter. This figure reveals that the optimum concentration of lactic acid for the photocatalytic H<sub>2</sub> evolution over the as-prepared NiS/CdS NWs is 20 vol.%.

Shundong Guan, et al., *Chemical Science*, Figure S3

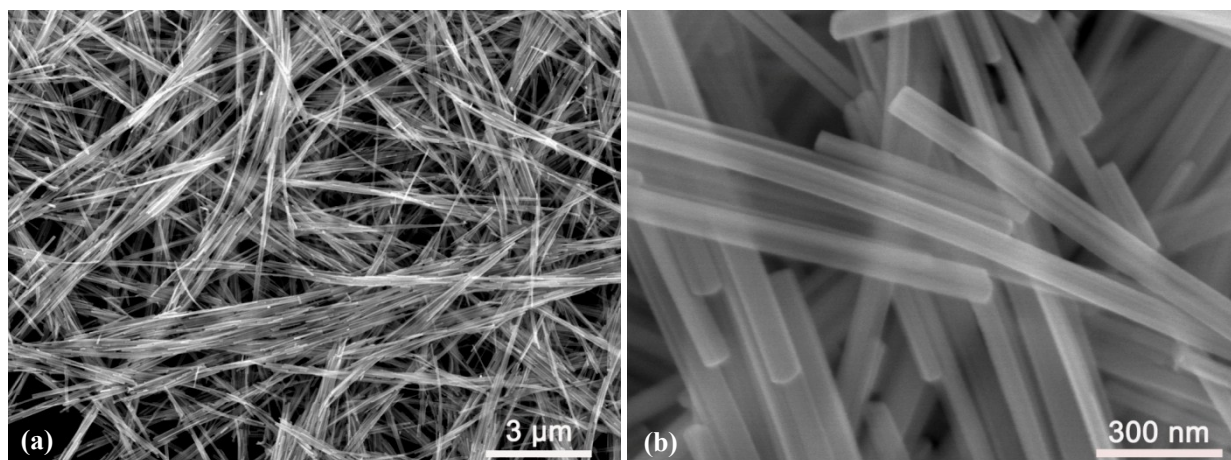

**Figure S3** Typical SEM images of the synthesized pure CdS NWs at low (a) and high (b) magnifications. The CdS NWs have an average diameter of about 30 nm and a length of 5-10 μm.

Shundong Guan, et al., *Chemical Science*, Figure S4

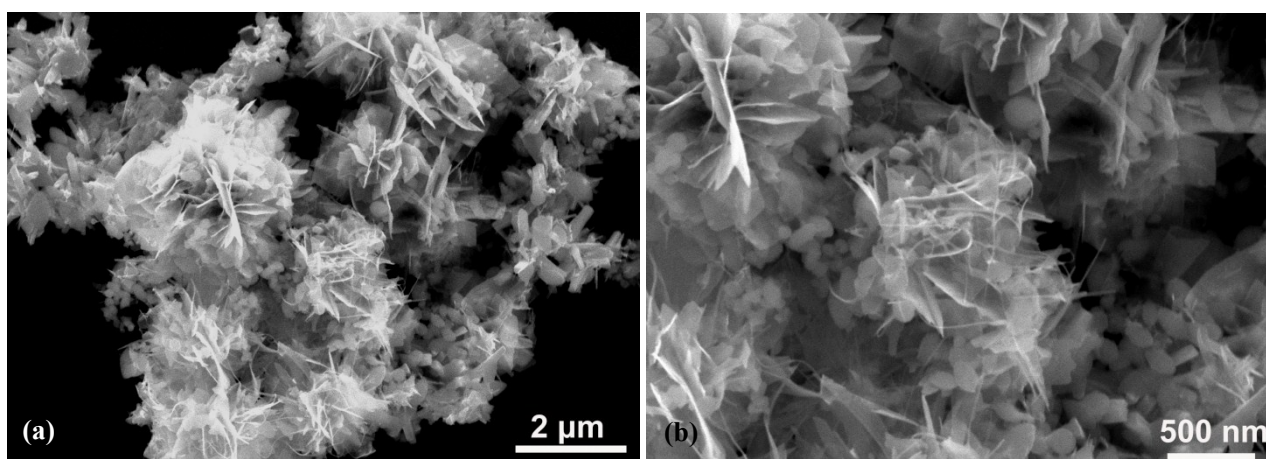

**Figure S4** Typical SEM images of the synthesized pure NiS sample at low (a) and high (b) magnifications, indicating that it consists of flower-like nanosheets and nanoparticles.

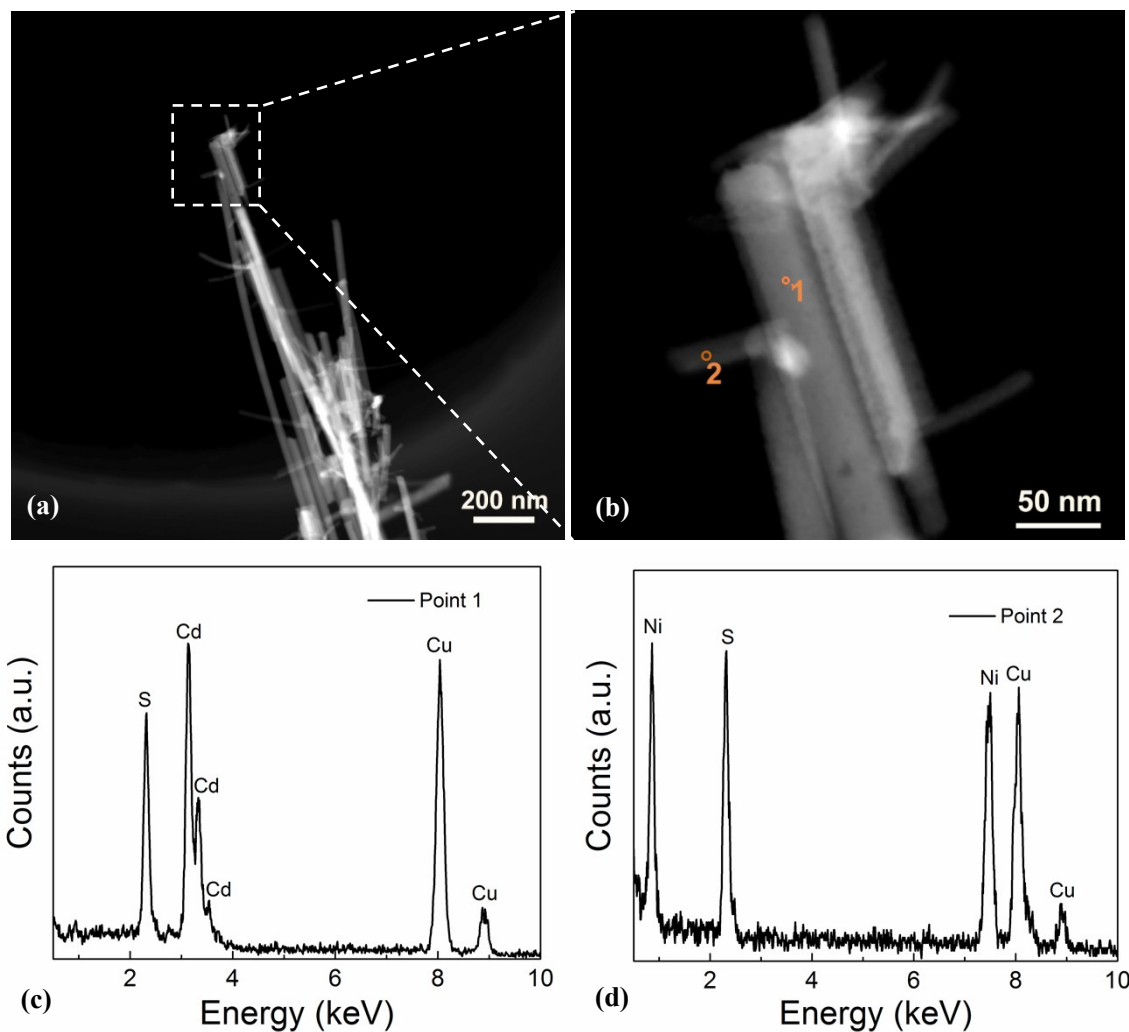

**Figure S5** (a) low and (b) high magnification STEM images of the optimal NiS/CdS NWs prepared at the Ni/Cd feed molar ratio of 0.8. (c) and (d) EDX spectra of the point 1 and 2 as shown in (b), respectively. This figure indicates the successful loading of NiS nanoflakes onto CdS NWs.

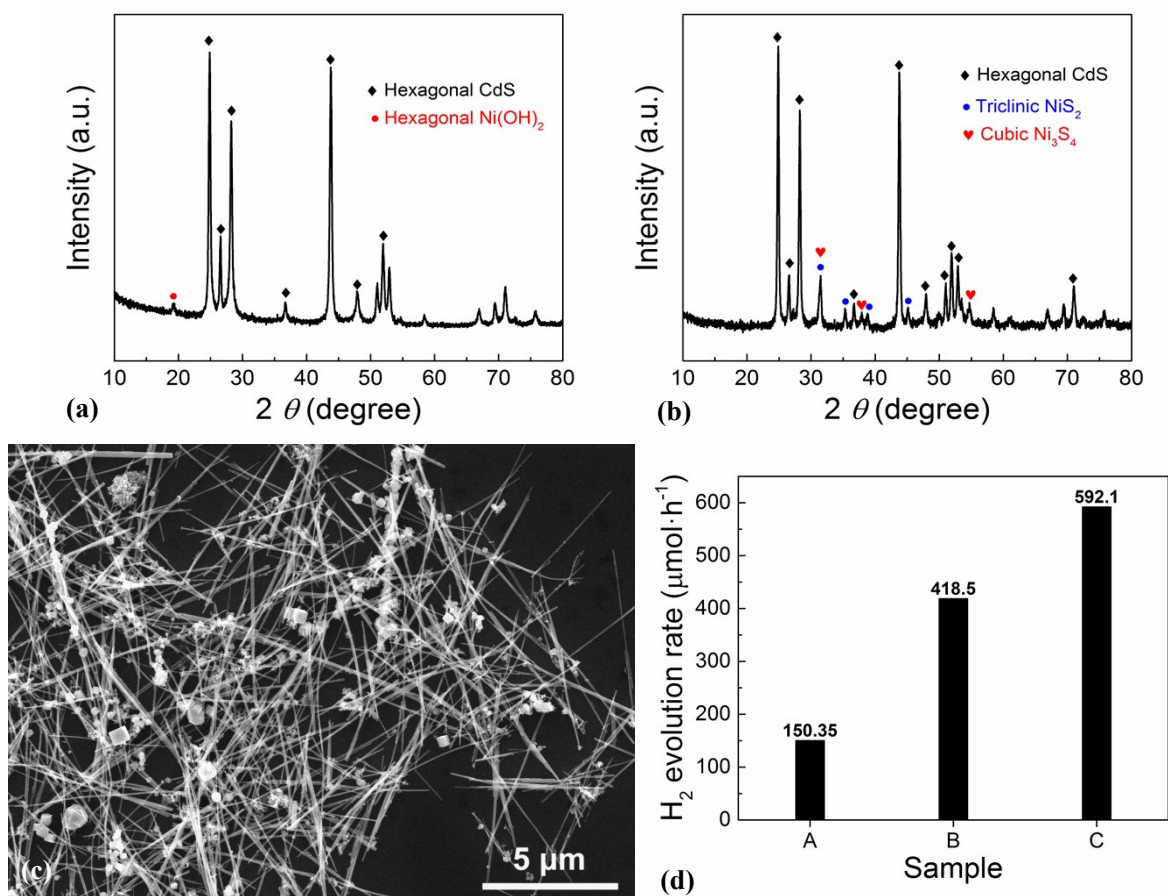

**Figure S6** XRD patterns of the products prepared at a Ni/Cd feed molar ratio of 0.8 without  $\text{NaH}_2\text{PO}_2 \cdot \text{H}_2\text{O}$  while the Ni/S molar ratio was 1:4 (a) and 1:20 (b), respectively. (c) Typical SEM image of the product prepared at a Ni/Cd feed molar ratio of 0.8 and Ni/S feed molar ratio of 1:20 without  $\text{NaH}_2\text{PO}_2 \cdot \text{H}_2\text{O}$ . (d) The  $\text{H}_2$  evolution rate over the products prepared under different conditions. Among them, Samples A and B were prepared at a Ni/Cd feed molar ratio of 0.8 without  $\text{NaH}_2\text{PO}_2 \cdot \text{H}_2\text{O}$  while the Ni/S molar ratio was 1:4 and 1:20, respectively; and Sample C was prepared at a Ni/Cd feed molar ratio of 0.8 with 0.6 mmol of  $\text{NaH}_2\text{PO}_2 \cdot \text{H}_2\text{O}$  while the Ni/S feed molar ratio was 1:4. The data were calculated based on the  $\text{H}_2$  amount generated in the first 4 h reaction. Reaction conditions: 5 mg of the catalysts; 100 mL of aqueous solution containing 20 vol.% lactic acid; 7 °C; and visible light irradiation ( $\lambda \geq 420$  nm) provided by a 300 W Xe lamp with a cut-off filter. This figure reveals that  $\text{NaH}_2\text{PO}_2 \cdot \text{H}_2\text{O}$  is crucial for the successful loading of  $\beta$ -NiS onto CdS NWs to prepare a high-performance photocatalyst.

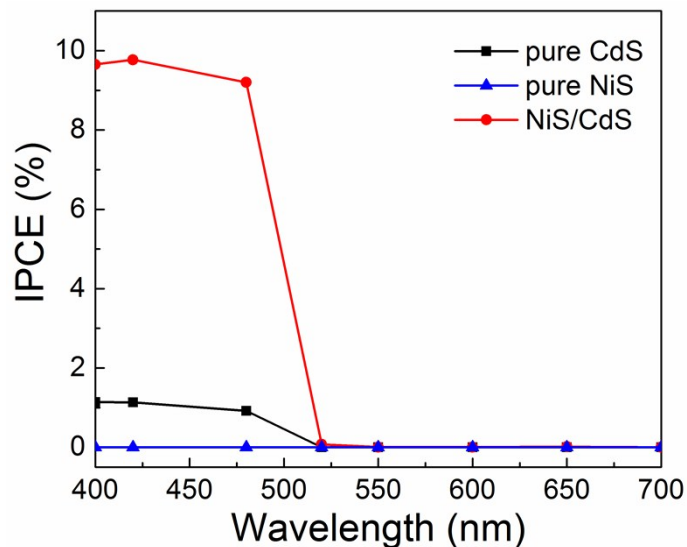

**Figure S7** Incident photon-to-electron conversion efficiencies (IPCE) of the pure CdS NWs, pure NiS nanostructures and optimal NiS/CdS NWs prepared at the Ni/Cd feed molar ratio of 0.8.

All the IPCE data were calculated by,<sup>[S1]</sup>

$$IPCE = \frac{1240 \times J}{\lambda \times I_{light}} \times 100\% \quad (1)$$

where  $J$  is the measured photocurrent, and  $I_{light}$  is the light intensity at the wavelength  $\lambda$  of 400±5, 420±5, 480±5, 520±5, 550±5, 600±5, 650±5 and 700±5 nm, respectively, which is measured by an irradiator (FZ-A, Photoelectric Instrument Factory of Beijing Normal University, Beijing, China).

As is seen from this figure, under light irradiation in the range of 400-520 nm, pure  $\beta$ -NiS nanostructures almost have no ability to photo-to-electron conversion, while pure CdS NWs presented a small photon-to-electron conversion efficiency. However, after the loading of  $\beta$ -NiS onto CdS NWs, the photon-to-electron conversion efficiency was dramatically enhanced through the present NiS/CdS NWs hybrid structures. Meanwhile, under light irradiation after 520 nm, all the three samples (pure CdS, pure NiS and NiS/CdS hybrid structure) have very low photon-to-electron conversion efficiency. These results reveal that in the present NiS/CdS NWs hybrids, NiS is not a photocatalyst but only serves as a co-catalyst for CdS NWs to effectively promote the separation of photo-generated electron-hole pairs.

Table S1 Practical molar ratios of NiS in the photocatalysts prepared at various Ni/Cd feed molar ratios

measured by SEM-EDX analysis

|                                          |                |        |       |       |       |                 |
|------------------------------------------|----------------|--------|-------|-------|-------|-----------------|
| <b>Designed Ni/Cd feed molar ratio</b>   | 0:1 (pure CdS) | 0.2:1  | 0.3:1 | 0.4:1 | 0.5:1 | 0.6:1           |
| <b>Practical molar percentage of NiS</b> | 0%             | 0.53%  | 0.96% | 2.39% | 4.87% | 7.01%           |
| <b>Designed Ni/Cd feed molar ratio</b>   | 0.7:1          | 0.8:1  | 0.9:1 | 1:1   | 1.2:1 | 1:0             |
| <b>Practical molar percentage of NiS</b> | 9.89%          | 11.75% | 13.8% | 15.2% | 18.6% | 100% (pure NiS) |



**Table S2** Review on CdS-based noble metal-free photocatalysts for H<sub>2</sub> evolution

| Photocatalyst | Co-catalyst                              | Light source <sup>a</sup>           | Aqueous <sup>b</sup>                                              | T <sup>c</sup> | H <sub>2</sub> evolution                      |               |                | Ref.      |
|---------------|------------------------------------------|-------------------------------------|-------------------------------------------------------------------|----------------|-----------------------------------------------|---------------|----------------|-----------|
|               |                                          |                                     |                                                                   |                | Rate (μmol·h <sup>-1</sup> ·g <sup>-1</sup> ) | AQY (%)       | F <sup>d</sup> |           |
| CdS nanowires | NiS                                      | 300 W Xe (λ ≥ 420 nm)               | 20 vol% Lactic acid                                               | 7 °C           | 118420                                        | 57.8 (420 nm) | 204            | This work |
|               |                                          |                                     |                                                                   | 25 °C          | 158720                                        | 74.1 (420 nm) | 250            |           |
| CdS nanorods  | 0.5 wt% Ni <sub>2</sub> P                | 300 W Xe (λ ≥ 420 nm)               | 1.05 M Na <sub>2</sub> SO <sub>3</sub> + 0.75 M Na <sub>2</sub> S | RT             | 1200000                                       | 41 (450 nm)   | 22             | [3]       |
| CdS nanorods  | Ni                                       | LED (447 nm)                        | Ethanol                                                           | RT             | 63000                                         | 53 (447 nm)   |                | [5]       |
| CdS           | MoP                                      | 300 W Xe (λ ≥ 420 nm)               | 20 vol% Lactic acid                                               | 20 °C          | 73333                                         | 45 (460 nm)   |                | [11]      |
| CdS           | 15 wt% MoS <sub>2</sub>                  | 300 W Xe (λ ≥ 420 nm)               | 0.02 M Na <sub>2</sub> SO <sub>3</sub> + 0.1 M Na <sub>2</sub> S  | RT             | 4470                                          |               | 10             | [12]      |
| CdS           | 0.2 wt% MoS <sub>2</sub>                 | 300 W Xe (λ ≥ 420 nm)               | 10 vol% Lactic acid                                               | RT             | 5400                                          |               | 36             | [13]      |
| CdS nanorods  | 16.7 wt% MoP                             | 300 W Xe (λ ≥ 420 nm)               | 10 vol% Lactic acid                                               | RT             | 163200                                        | 5.8 (450 nm)  | 20             | [14]      |
| CdS           | 11 mol% WS <sub>2</sub>                  | 300 W Xe (λ ≥ 420 nm)               | 10 vol% Lactic acid                                               | RT             | 1984                                          |               | 16             | [15]      |
| CdS           | 10 wt% WC                                | 500 W Xe (λ ≥ 420 nm)               | 0.02 M Na <sub>2</sub> SO <sub>3</sub> + 0.1 M Na <sub>2</sub> S  | RT             | 1400                                          |               | 23             | [16]      |
| CdS           | 1 wt% WS <sub>2</sub>                    | 300 W Xe (λ ≥ 420 nm)               | 10 vol% Lactic acid                                               | 10±5 °C        | 4200                                          | 5 (420 nm)    | 28             | [17]      |
| CdS nanorods  | 6 wt% Co <sub>2</sub> P                  | 300 W Xe                            | 10 vol% Lactic acid                                               | RT             | 10800                                         |               | 16             | [18]      |
| CdS nanowires | 6.5 mol% Co(OH) <sub>2</sub>             | 300 W Xe (λ ≥ 420 nm)               | 30 vol% TEOA                                                      | RT             | 14430                                         |               | 206            | [19]      |
| CdS nanorods  | 6.8 mol% Co(OH) <sub>2</sub>             | 500 W Xe                            | 25 vol% Ethanol                                                   | RT             | 61                                            |               | 41             | [20]      |
| CdS nanorods  | 3 mol% Co <sub>3</sub> O <sub>4</sub>    | 300 W Xe (λ ≥ 420 nm)               | 0.5 M Na <sub>2</sub> SO <sub>3</sub> + 0.5 M Na <sub>2</sub> S   | RT             | 236                                           |               | 33             | [21]      |
| CdS nanorods  | 4.86 wt% Ni <sub>3</sub> N               | 300 W Xe (λ ≥ 420 nm)               | 0.35 M Na <sub>2</sub> SO <sub>3</sub> + 0.25 M Na <sub>2</sub> S | RT             | 88000                                         | ~13 (420 nm)  | 10             | [22]      |
| CdS           | 13.2 mol% Ni <sub>2</sub> O <sub>3</sub> | 300 W Xe (λ ≥ 400 nm)               | 30 vol% Methanol                                                  | RT             | 4456                                          |               | 4.1            | [23]      |
| CdS           | 1 mol% NiO <sub>x</sub>                  | 300 W Xe (λ ≥ 400 nm)               | 30 vol% Methanol                                                  | RT             | 5908                                          | 8.6 (400 nm)  | 117            | [24]      |
| CdS           | 32 mol% NiO                              | 500 W Phoenix tungsten halogen lamp | 0.25 M Na <sub>2</sub> SO <sub>3</sub> + 0.35 M Na <sub>2</sub> S | RT             | 745                                           | 6.02          |                | [25]      |

|               |                                          |                                   |                                                                   |       |        |               |      |       |
|---------------|------------------------------------------|-----------------------------------|-------------------------------------------------------------------|-------|--------|---------------|------|-------|
| CdS nanorods  | 23 mol% Ni(OH) <sub>2</sub>              | 300 W Xe ( $\lambda \geq 420$ nm) | 25 vol% TEOA                                                      | RT    | 5084   | 28 (420 nm)   | 145  | [26]  |
| CdS           | 1.2 mol% NiS                             | 300 W Xe ( $\lambda \geq 420$ nm) | 30 vol% Lactic acid                                               | RT    | 7267   | 51.3 (420 nm) | 34   | [27]  |
| CdS nanorods  | 5 mol% NiS                               | 300 W Xe ( $\lambda \geq 420$ nm) | 0.25 M Na <sub>2</sub> SO <sub>3</sub> + 0.35 M Na <sub>2</sub> S | RT    | 1131   | 6.1 (420 nm)  | 21   | [28]  |
| CdS           | NiS                                      | 300 W Xe ( $\lambda \geq 420$ nm) | 30 vol% Lactic acid                                               | 35 °C | 28600  | 60.4 (420 nm) | ~30  | [29]  |
| CdS nanorods  | 3 mol% CuS                               | 500 W Xe                          | 0.25 M Na <sub>2</sub> SO <sub>3</sub> + 0.35 M Na <sub>2</sub> S | RT    | 332    |               | 3.5  | [31]  |
| CdS nanorods  | 0.44 wt% Cu <sub>3</sub> P               | 300 W Xe ( $\lambda \geq 420$ nm) | 1.75 M Na <sub>2</sub> SO <sub>3</sub> + 1.25 M Na <sub>2</sub> S | RT    | 200000 | 25 (420 nm)   | 6.6  | [32]  |
| CdS nanorods  | 4 wt% Ni                                 | 300 W Xe ( $\lambda \geq 420$ nm) | 1 M (NH <sub>4</sub> ) <sub>2</sub> SO <sub>3</sub>               | RT    | 25848  | 26.8 (420 nm) |      | [S2]  |
| CdS nanorods  | 5 wt% Ni                                 | 300 W Xe ( $\lambda \geq 400$ nm) | 50 vol% Lactic acid                                               | RT    | 30048  |               |      | [S3]  |
| CdS           | Ni                                       | 300 W Xe ( $\lambda \geq 395$ nm) | 4.6 M Na <sub>2</sub> SO <sub>3</sub> + 3.3 M Na <sub>2</sub> S   | RT    | 2.5    |               | 10   | [S4]  |
| CdS           | 0.4 wt% RGO + 2 wt% MoS <sub>2</sub>     | 500 W UV-vis lamp                 | 10 vol% Lactic acid                                               | RT    | 6857   |               | 71   | [S5]  |
| CdS nanorods  | 30 wt% Fe <sub>2</sub> P                 | 300 W Xe ( $\lambda \geq 420$ nm) | 0.5 M Ascorbic acid                                               | RT    | 186000 | 15 (450 nm)   | 31   | [S6]  |
| CdS           | 2 wt% Ni <sub>2</sub> P                  | simulated solar radiation         | 20 vol% Lactic acid                                               | RT    | 33480  |               | 62   | [S7]  |
| CdS nanorods  | 6 wt% WS <sub>2</sub> -MoS <sub>2</sub>  | 150 W Xe (AM 1.5G)                | 20 vol% Lactic acid                                               | RT    | 209790 | 51.4 (425 nm) | 83   | [S8]  |
| CdS nanowires | MoS <sub>2</sub>                         | 300 W Xe ( $\lambda \geq 400$ nm) | 50 vol% Lactic acid                                               | 5 °C  | 10850  | 22 (475 nm)   | 28   | [S9]  |
| CdS           | MoS <sub>2</sub>                         | 300 W Xe ( $\lambda \geq 420$ nm) | 20 vol% Lactic acid                                               | RT    | 3875   | 14.7 (420 nm) | 65   | [S10] |
| CdS nanorods  | 5.0 wt% Cu <sub>2</sub> MoS <sub>4</sub> | 150 W Xe                          | 20 vol% Lactic acid                                               | RT    | 15560  |               | 4.2  | [S11] |
| CdS           | Ti <sub>3</sub> C <sub>2</sub>           | 300 W Xe ( $\lambda \geq 420$ nm) | 22 vol% Lactic acid                                               | RT    | 14342  | 40.1 (420 nm) | 136  | [S12] |
| CdS nanorods  | 6 wt% MoS <sub>2</sub>                   | natural solar radiation           | 20 vol% Lactic acid                                               | RT    | 174000 | 38.7 (425 nm) | 14.5 | [S13] |

a) Xe: xenon lamp; Hg: mercury lamp

b) TEOA: triethanolamine

c) T: reaction temperature; RT: room temperature

d) F: enhancement factor (vs. pure CdS)

## References

- [S1] F.K. Meng, J.T. Li, Scott K Cushing, M.J. Zhi, N. Q. (Nick) Wu. Solar Hydrogen Generation by Nanoscale p-n Junction of p-type Molybdenum Disulfide/n-type Nitrogen-Doped Reduced Graphene Oxide. *Journal of American Chemical Society*, 2013, 135 (28): 10286–10289.
- [S2] H. Wang, W. Chen, J. Zhang, C.P. Huang, L.Q. Mao. Nickel nanoparticles modified CdS: A potential photocatalyst for hydrogen production through water splitting under visible light irradiation. *International Journal of Hydrogen Energy*, 2015, 40(1): 340-345.
- [S3] S. Chen, X.P. Chen, Q.Z. Jiang, J. Yuan, C.F. Lin, W.F. Shangguan. Promotion effect of nickel loaded on CdS for photocatalytic H<sub>2</sub> production in lactic acid solution. *Applied Surface Science*, 2014, 316: 590-594.
- [S4] S. Devi, P. Korake, S.N. Achary, N.M. Gupta. Genesis of enhanced photoactivity of CdS/Ni<sub>x</sub> nanocomposites for visible-light-driven splitting of water. *International Journal of Hydrogen Energy*, 2014, 39(34): 19424-19433.
- [S5] T.T. Jia, A. Kolpin, C.S. Ma, R.C.T. Chan, W.M. Kwok, S.C.E. Tsang. A graphene dispersed CdS-MoS<sub>2</sub> nanocrystal ensemble for cooperative photocatalytic hydrogen production from water. *Chemical Communications*, 2014, 50: 1185-1188.
- [S6] Z.J. Sun, H.L. Chen, Q. Huang, P.W. Du. Enhanced photocatalytic hydrogen production in water under visible light using noble-metal-free ferrous phosphide as an active cocatalyst. *Catalysis Science & Technology*, 2015, 5: 4964-4967.
- [S7] D.P. Kumar, J.H. Choi, S.Y. Hong, D.A. Reddy, S.H. Lee, T.K. Kim. Rational synthesis of metal-organic framework-derived noble metal-free nickel phosphide nanoparticles as a highly efficient cocatalyst for photocatalytic hydrogen evolution. *ACS Sustainable Chemistry & Engineering*, 2016, 4(12): 7158-7166.

- [S8] D.A. Reddy, H. Park, R. Ma, D.P. Kumar, M.H. Lim, T.K. Kim. Heterostructured WS<sub>2</sub>-MoS<sub>2</sub> ultrathin nanosheets integrated on CdS nanorods for promoting charge separation and migration to improve solar-driven photocatalytic hydrogen evolution. *ChemSusChem*, 2017, 10(7): 1563-1570.
- [S9] H.F. Lin, Y.Y. Li, H.Y. Li, X. Wang. Multi-node CdS hetero-nanowires grown with defect-rich oxygen-doped MoS<sub>2</sub> ultrathin nanosheets for efficient visible-light photocatalytic H<sub>2</sub> evolution. *Nano Research*, 2017, 10(4): 1377-1392.
- [S10] A.P. Wu, C.G. Tian, Y.Q. Jiao, Q. Yan, G.Y. Yang, H.G. Fu. Sequential two-step hydrothermal growth of MoS<sub>2</sub>/CdS core-shell heterojunctions for efficient visible light-driven photocatalytic H<sub>2</sub> evolution. *Applied Catalysis B: Environmental*, 2017, 203: 955-963.
- [S11] S.Y. Hong, D. Praveen Kumar, D.A. Reddy, J.H. Choi, T.K. Kim. Excellent photocatalytic hydrogen production over CdS nanorods via using noble metal-free copper molybdenum sulfide (Cu<sub>2</sub>MoS<sub>4</sub>) nanosheets as co-catalysts. *Applied Surface Science*, 2017, 396: 421-429.
- [S12] J.R. Ran, G.P. Gao, F.T. Li, T.Y. Ma, A.J. Du, S.Z. Qiao. Ti<sub>3</sub>C<sub>2</sub> MXene co-catalyst on metal sulfide photo-absorbers for enhanced visible-light photocatalytic hydrogen production. *Nature Communications*, 2017, 8: 13907.
- [S13] D.P. Kumar, S.Y. Hong, D.A. Reddy, T.K. Kim. Noble metal-free ultrathin MoS<sub>2</sub> nanosheet-decorated CdS nanorods as an efficient photocatalyst for spectacular hydrogen evolution under solar light irradiation. *Journal of Materials Chemistry A*, 2016, 4: 18551-18558.
